# Supplementary material for: The use of thermostable fluorescent proteins for live imaging in Sulfolobus acidocaldarius
Source: PubMed Central journal article supplement (PMC11416942; doi:10.3389/fmicb.2024.1445186), 2024-09-09
Supplement: Data_Sheet_1.pdf [file Data_Sheet_1.pdf]

**Supplementary material to**

**The use of thermostable fluorescent proteins for live imaging  
in *Sulfolobus acidocaldarius***

**Alejandra Recalde, Jasmin Abdul Nabi, Pierre Junker, Chris van der Does, Jana Elsasser, Marleen van Wolferen and Sonja-Verena Albers\***

<sup>1</sup> Molecular Biology of Archaea, Institute of Biology - Microbiology, University of Freiburg, 79104 Freiburg, Germany

**\*Correspondence:**

S.V. Albers, e-mail: [sonja.albers@biologie.unifreiburg.de](mailto:sonja.albers@biologie.unifreiburg.de), tel.: +49(0)761 203 2630

**Keywords: Sulfolobus, Fluorescent Microscopy, Thermal Fluorescent Protein, Archaea, In vivo localization, Thermomicroscopy**

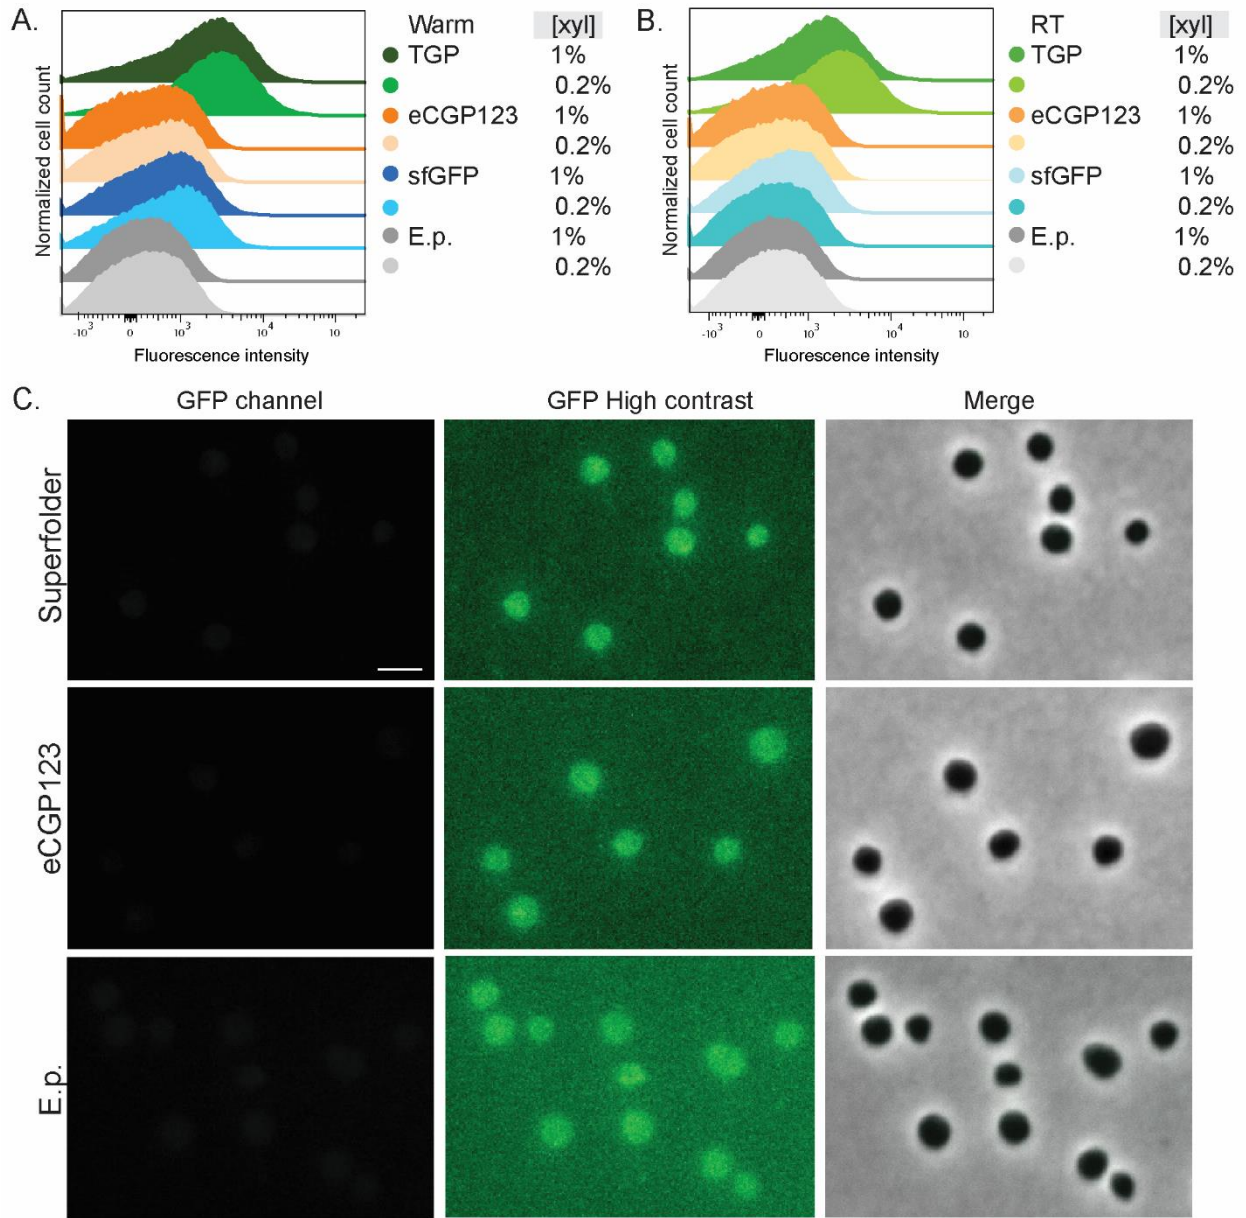

Figure S1. *S. acidocaldarius* expressing different green fluorescent proteins. Fluorescence intensity in flow cytometry of (A) preheated samples (warm) and (B) samples transported at room temperature, both induced with 0.2 or 1% xylose. Number of events for FC: 100.000. (C) Fluorescent microscopy and merge with phase contrast images of cells induced with 0.2% xylose and at room temperature. Contrast settings were the same as for TGP in figure 1C, additionally high contrast was used to show low levels of fluorescence.

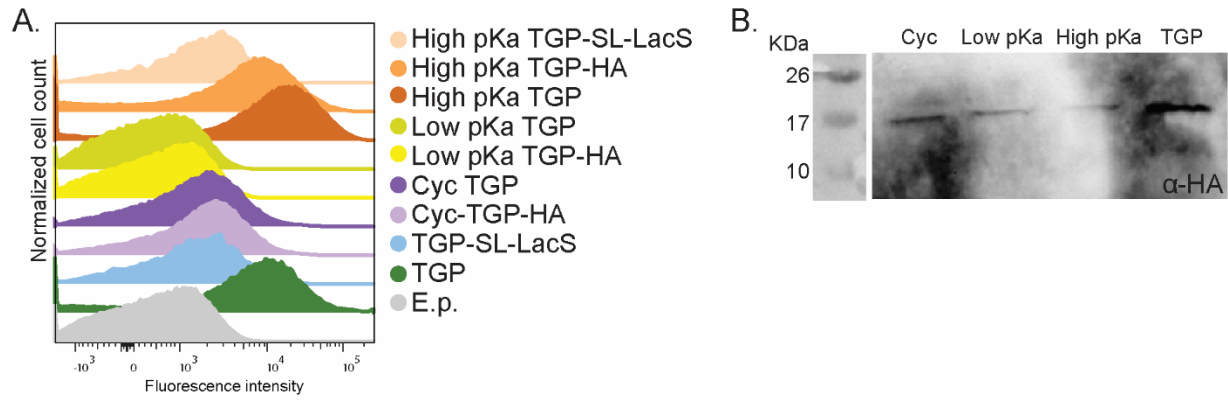

Figure S2. TGP variants with mutations introduced to modify pKa value and sulfur bridges. (A) Fluorescence intensity in flow cytometry at RT and 0.2% xylose induction. Number of events per sample: 100.000. (B) Western blot of the HA tagged versions of the different protein. Samples were normalized to the same theoretical  $OD_{600}$ .

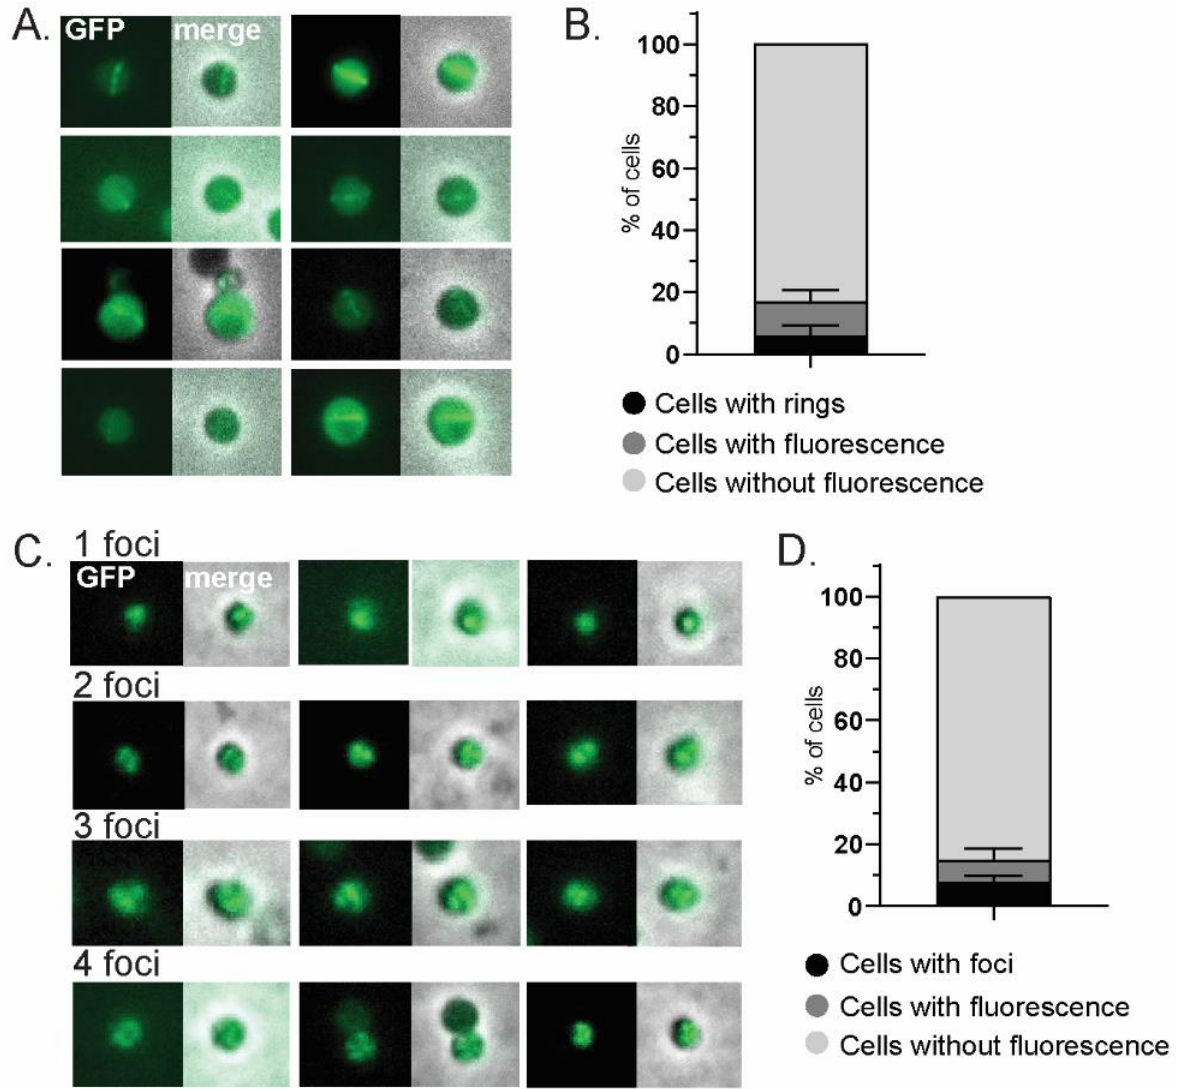

Figure S3. *In vivo* cell localization in *S. acidocaldarius* cells. (A) Examples of TGP-TL-CdvB rings. (B) Percentage of cells that show fluorescence of localization pattern (rings) in per image, mean values of triplicates. (C) Sample images of localization foci of TGP-TL-PCNA1. (D) Percentage of cells with localization foci and fluorescence, mean values of triplicates.

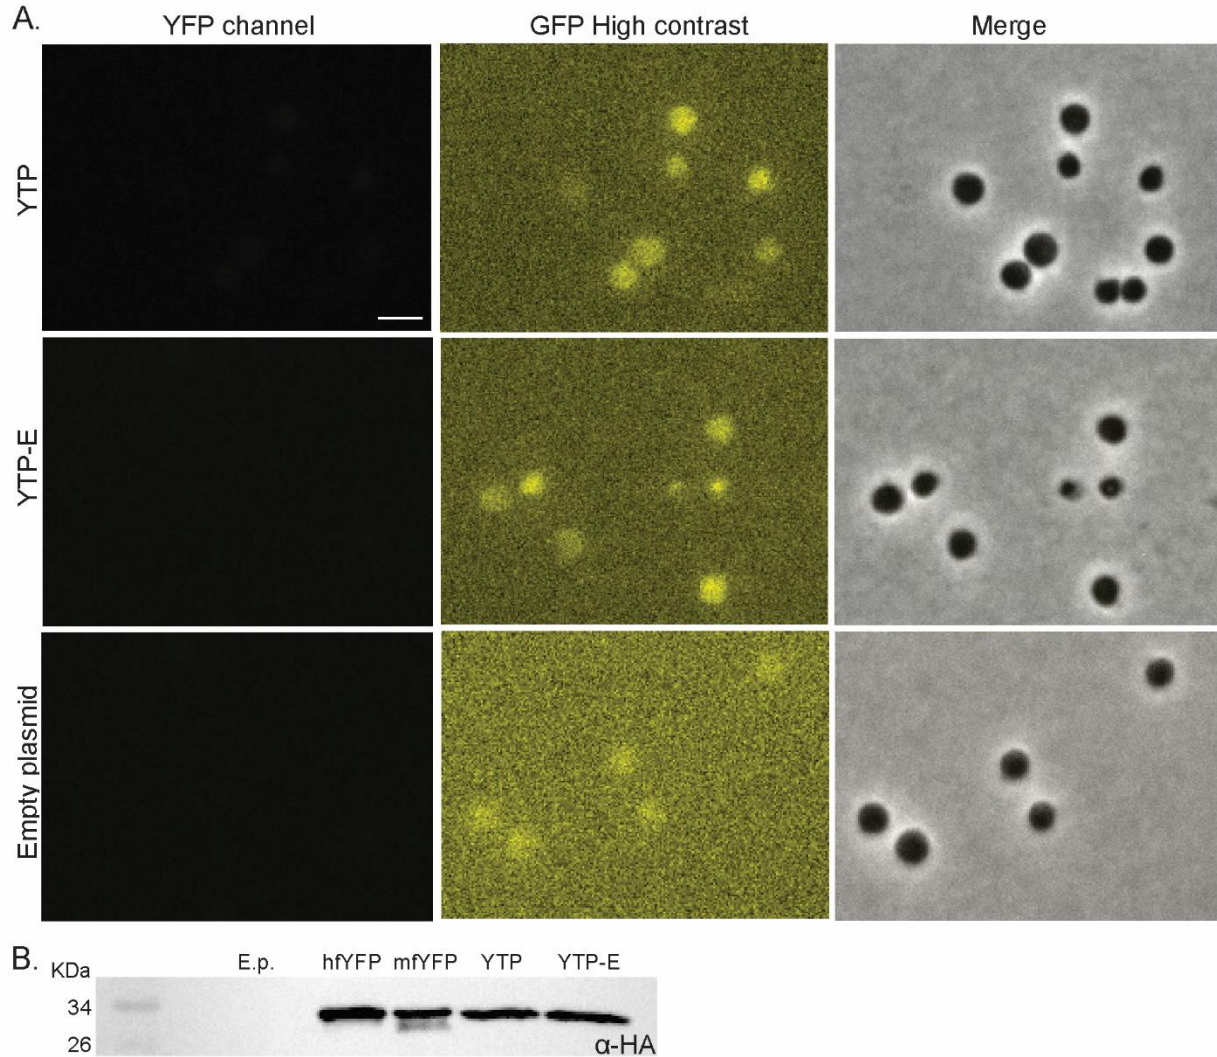

Figure S4. (A) Microscopy images of yellow fluorescent proteins. Fluorescent microscopy, phase contrast and a merged image of cells expressing YTP and YTP-E. Contrast settings were the same as for mYFP in figure 4, additionally high contrast was used to show low levels of fluorescence. (B) Western blot using anti HA antibodies, showing expression levels of the proteins used for FC and microscopy studies. E.p.: Empty plasmid.

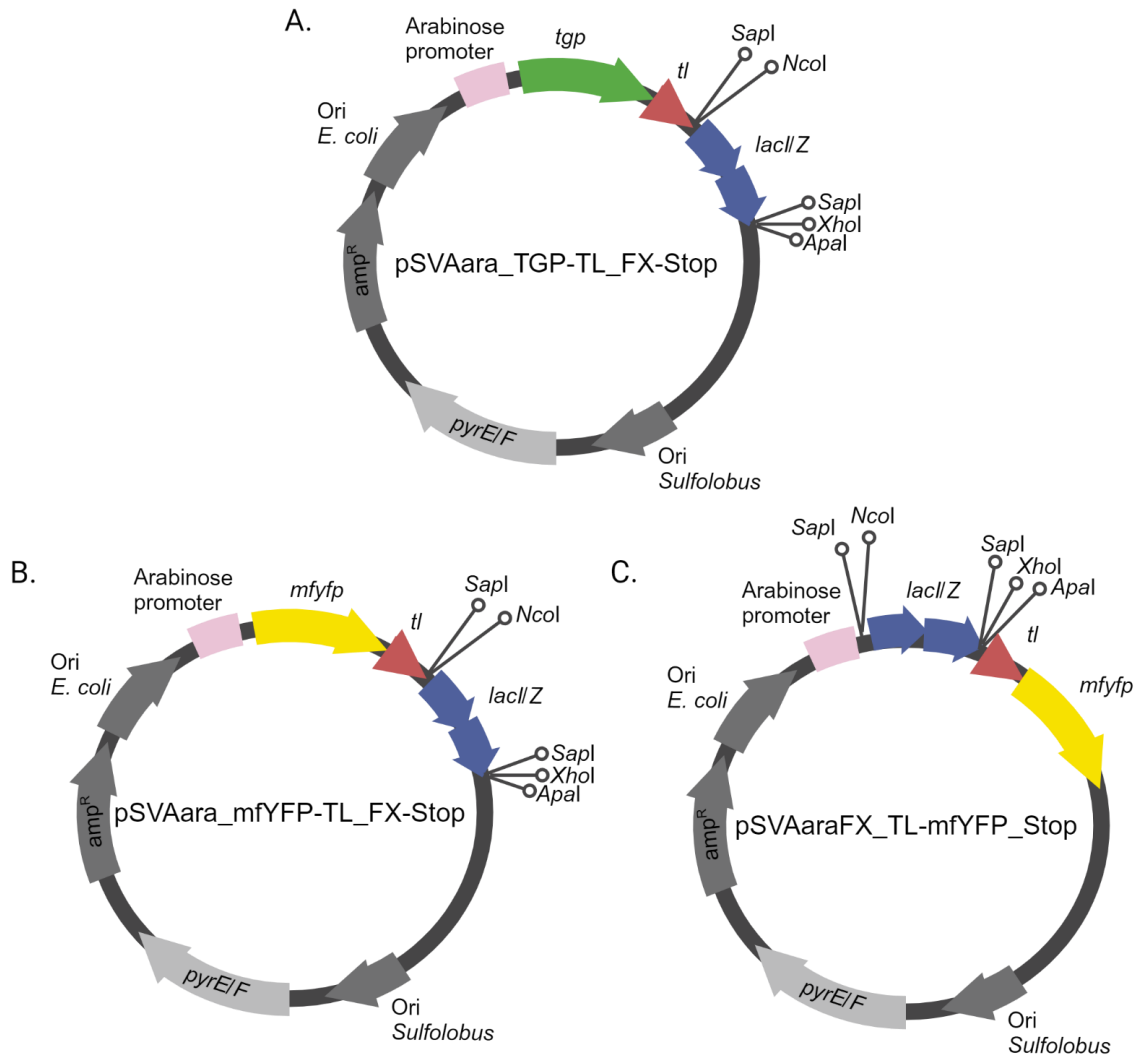

Figure S5. Schematic design of the plasmids (A) pSVAaraTGP-TL\_FXStop (pSVA6514), (B) pSVAara\_mfYFP-TL\_FX-Stop (pSVA7000) and (C) pSVAara\_FX\_TL-mfYFP-Stop (pSVA7001), containing an arabinose promoter, *tgp* or *mfYFP*, the thermolinker (*tl*) and *lacI/Z* flanked by restriction sites *NcoI* and *XhoI* to insert a gene of interest in frame as TGP-TL-gene, mfYFP-TL-gene or gene-TL-mfYFP, respectively, followed by a stop codon. Alternatively, *SapI* can be used to clone via FX cloning. Amp<sup>R</sup>: ampicillin resistance cassette for selection in *E. coli*, *pyrE/F*: cassette for selection in *Sulfolobus* (uracil auxotrophy), Ori: origin of replication. Created with BioRender.com.

**Table S1.** Plasmids used in this work

| <b>pSVA</b>                      | <b>pSVA backbone</b> | <b>Description</b>                                                                             | <b>Reference</b>            |
|----------------------------------|----------------------|------------------------------------------------------------------------------------------------|-----------------------------|
| araFx_Stop                       |                      | Backbone for expression plasmids                                                               | (van der Kolk et al., 2020) |
| araFX_HA                         |                      | Backbone for expression plasmids                                                               | (van der Kolk et al., 2020) |
| araFX_NtHA                       |                      | Backbone for expression plasmids                                                               | (van der Kolk et al., 2020) |
| <b>Green fluorescent protein</b> |                      |                                                                                                |                             |
| 12825                            | pSVAaraFx_Stop       | TGP                                                                                            | This work                   |
| 2584                             | pSVAaraFX_NtHA       | HA-TGP                                                                                         | This work                   |
| 2585                             | pSVAaraFX_HA         | TGP-HA                                                                                         | This work                   |
| 5597                             | pSVA2585             | LacS-SL-TGP-HA                                                                                 | This work                   |
| 13120                            | pSVAaraFX_HA         | sfGFP-HA                                                                                       | This work                   |
| 13127                            | pSVAaraFX_HA         | eCGP123-HA                                                                                     | This work                   |
| 13157                            | pSVA12825            | TGP-SL-LacS                                                                                    | This work                   |
| 13186                            | pSVA2585             | TGP-SL-LacS-HA                                                                                 | This work                   |
| <b>Linkers</b>                   |                      |                                                                                                |                             |
| 13158                            | pSVAaraFx_Stop       | TGP-TL-LacS                                                                                    | This work                   |
| 13159                            | pSVAaraFx_HA         | TGP-TL-LacS-HA                                                                                 | This work                   |
| 13184                            | pSVA2585             | LacS-TL-TGP                                                                                    | This work                   |
| 13143                            | pSVAaraFx_HA         | pSVAara_FL_TGP_HA                                                                              | This work                   |
| 13144                            | pSVAaraFx_HA         | pSVAara_RL_TGP_HA                                                                              | This work                   |
| 13145                            | pSVAaraFx_HA         | pSVAara_SRL_TGP_HA_                                                                            | This work                   |
| 13146                            | pSVA13144            | LacS-RL-TGP-HA                                                                                 | This work                   |
| 13148                            | pSVAaraFx_Stop       | LacS-RL-TGP                                                                                    | This work                   |
| 13151                            | pSVA13145            | LacS-SRL-TGP-HA                                                                                | This work                   |
| 13154                            | pSVAaraFx_Stop       | LacS-SRL-TGP                                                                                   | This work                   |
| 13155                            | pSVA13143            | LacS-FL-TGP-HA                                                                                 | This work                   |
| 13156                            | pSVAaraFx_Stop       | LacS-FL-TGP                                                                                    | This work                   |
| <b>TGP variants</b>              |                      |                                                                                                |                             |
| 13178                            | pSVAaraFx_Stop       | Cyc TGP (C103S C113S C171S) (codon adapted gene ordered in GenScript)                          | This work                   |
| 13179                            | pSVAaraFx_Stop       | Low pKa TGP (K5E K9E K21E K137E R186E K202E) (codon adapted gene ordered in GenScript)         | This work                   |
| 13180                            | pSVAaraFx_Stop       | High pKa TGP (E26R E45R E73R E89R E109R E117R D187R) (codon adapted gene ordered in GenScript) | This work                   |
| 13181                            | pSVAaraFX_HA         | Cyc TGP-HA                                                                                     | This work                   |
| 13182                            | pSVAaraFX_HA         | Low pKa TGP-HA                                                                                 | This work                   |
| 13183                            | pSVAaraFX_HA         | High pKa TGP -HA                                                                               | This work                   |
| 13187                            | pSVA13183            | High pKa TGP-SL-LacS-HA                                                                        | This work                   |
| <b>Cell localization</b>         |                      |                                                                                                |                             |

|                                       |                |                                                            |           |
|---------------------------------------|----------------|------------------------------------------------------------|-----------|
| 6500                                  | pSVAaraFX_Stop | Expression TGP-TL-cdvB (saci_1373)                         | This work |
| 6552                                  | pSVAaraFx_Stop | native promoter PCNA1, expression TGP-TL-PCNA1 (saci_0826) | This work |
| <b>Yellow fluorescent proteins</b>    |                |                                                            |           |
| 6506                                  | pSVAaraFX_Stop | hfYFP (codon adapted gene ordered in GenScript)            | This work |
| 6545                                  | pSVAaraFX_Stop | mfYFP                                                      | This work |
| 6593                                  | pSVAaraFX_HA   | mfYFP-HA                                                   | This work |
| 6594                                  | pSVAaraFX_NtHA | HA-mfYFP                                                   | This work |
| 6586                                  | pSVA12825      | YTP                                                        | This work |
| 6580                                  | pSVAaraFX_HA   | YTP-HA                                                     | This work |
| 6581                                  | pSVAaraFX_NtHA | HA-YTP                                                     | This work |
| 6576                                  | pSVA6586       | YTP-E                                                      | This work |
| 6582                                  | pSVAaraFX_HA   | YTP-E-HA                                                   | This work |
| 6583                                  | pSVAaraFX_NtHA | HA-YTP-E                                                   | This work |
| <b>Generated plasmids for cloning</b> |                |                                                            |           |
| 6514                                  | pSVAaraFX-Stop | pSVAara_TGP-TL_FXStop                                      | This work |
| 7000                                  | pSVAaraFX-Stop | pSVAara_mfYFP-tl_FX-Stop                                   | This work |
| 7001                                  | pSVAaraFX-Stop | pSVAaraFX_tl-mfYFP_Stop                                    | This work |



**Table S2.** Primers used in this study

| Primer No. | Sequence (3'→5')                                                               | Use                                       |
|------------|--------------------------------------------------------------------------------|-------------------------------------------|
| 9355       | GCGCCTCGAGTCCACCACCACTACCACC                                                   | Rv <i>XhoI</i> <i>tgp</i>                 |
| 9356       | GCGCCCATGGCGGCAAGTGTAAATAAGCCTGAGATG                                           | Fw <i>NcoI</i> <i>tgp</i>                 |
| 8662       | GACTCCATGGACTCATTTCCAAATAGCTTTAGG                                              | Fw <i>lacS</i>                            |
| 8663       | GACTGGATCCGTGCCTTAATGGCTTTACTGGAGGTACGCTAT                                     | Rv <i>lacS</i>                            |
| 11657      | ATATATGCTCTTCTAGTTCTAAGGGTGAGGAGTTATTCAGTGG                                    | Fw <i>SapI</i> <i>sfGFP</i>               |
| 11658      | TATATAGCTCTTCATGCCCTTATTTATATAACTCATCCATTCCA                                   | Rv <i>SapI</i> <i>sfGFP</i>               |
| 11680      | ACGTCCATGGATGAGTGTAAATAAGCCTGAAATGA                                            | Fw <i>NcoI</i> <i>eCGP123</i>             |
| 11681      | GCATCTCGAGTTTAGCTTGACTTGGTAACATA                                               | Rv <i>XhoI</i> <i>eCGP123</i>             |
| 12026      | GACTCCATGGACTCATTTCCAAATAGCTTTAGGTTT                                           | Fw <i>NcoI</i> <i>lacS</i>                |
| 12027      | GACTCCATgGGAATTACCTGATCCAGCAGCTGAACCAGCTGATCC<br>GTGCCTTAATGGCTTTACTG          | Rv <i>XhoI</i> <i>lacS</i>                |
| 12045      | ATGGCGGCAAGTGTAAATAAGCCT                                                       | Fw plasmid<br>FX TGP                      |
| 12046      | CTCGAGTGCTGAAGAGCCGGATCC                                                       | Rv plasmid<br>FX TGP                      |
| 12047      | GGATCCGGCTCTTCAGCACTCGAG                                                       | Fw fragment<br>pUC linkers                |
| 12048      | AGGCTTTATTACACTTGCCGCCAT                                                       | Rv fragment<br>pUC linkers                |
| 12058      | GCAGCAGCTTCCTTTGCAGCTGCCTCTTTAGCTGCAGCTTCCTCGAGTGC<br>TGAAGAGCCGGAT            | Fw rigid linker<br>T4PKN                  |
| 12059      | AAAAGAGGCAGCTGCTAAGGAAGCAGCAGCTAAAATGGCGGCAAGTGTA<br>TAAAGCCTGA                | Rv rigid linker<br>T4PKN                  |
| 12062      | GCATCTCGAGGGATCAGCTGGTTCAGCTGCTGGATCAGGTGAATTTATGGA<br>CTCAT TTCCAAATAGCTTTAGG | Rv <i>XhoI</i> <i>lacS</i>                |
| 12071      | CATGCATGGGCCCTTACTCAAGCGATCCACCACCA                                            | Rv <i>lacS</i><br>thermolinker            |
| 12073      | GCATCTCGAGATGGACTCATTTCCAAATAGCTTTAGG                                          | Fw <i>XhoI</i> <i>LacS</i>                |
| 12074      | GGATCAGCTGGTTCAGCTGCTGGATCAGGTGAATTTATGGACTCATTTC<br>AATAGCTTTAGG              | Fw <i>LacS</i><br>thermolinker            |
| 12075      | AAATTCACCTGATCCAGCAGCTGAACCAGCTGATCCTCCACCACCACTAC<br>CACCACCAGA               | Rv TGP<br>thermolinker                    |
| 12088      | CATGCCATGGGAGCACATGCTTCTGTAA                                                   | Fw <i>NcoI</i> <i>tgp</i>                 |
| 12092      | ATGGCGGCAAGTGTAAATAAGCCT                                                       | Fw to put<br>pSVA13184<br>in frame        |
| 12093      | AAATTCACCTGATCCAGCAGCTGAA                                                      | Rv to put<br>pSVA13184<br>in frame        |
| 13216      | ATGCCTCGAGTGCTCCTCCGCCACTTCTCCACCA                                             | Rv TGP<br>variants                        |
| 13247      | GGATCAGCTGGTTCAGCTGCTGGATCAGGTGAATTTATGTTTGATAAGTTAT<br>TAATT CGA              | Fw <i>cdvB</i><br>thermolinker            |
| 13248      | TGCATCTCGAGACCCTCAAGAACAATTAGACCCTT                                            | Rv <i>XhoI</i> <i>cdvB</i>                |
| 13281      | ATGCCCATGGTATCAAAGGGTGAAGAAC                                                   | Fw <i>NcoI</i><br>hfYFP/mfYFP             |
| 13282      | TGCATCTCGAGTTTATATAAATTCATTCATATCATGAGTT                                       | Rv <i>XhoI</i><br>hfYFP                   |
| 13964      | CATAATGTTTATATAACAGCAG                                                         | Fw point<br>mutation<br>S147P in<br>hfYFP |

|       |                                                                             |                                       |
|-------|-----------------------------------------------------------------------------|---------------------------------------|
| 13965 | AGGATTGAAATTATATTCTAACTTATG                                                 | Rv point mutation S147P in hfYFP      |
| 13966 | CCTGATAATCATTATCTAAGTTATCAAT                                                | Fw point mutation L195M in hfYFP      |
| 13967 | CATTAGTACTGGTCCATCACCTATT                                                   | Rv point mutation L195M in hfYFP      |
| 13968 | AAACTATCTAAGGATCCTAATGAGAAA                                                 | Fw point mutation V206K in hfYFP      |
| 13969 | TGATTGATAACTTAGATAATG                                                       | Rv point mutation V206K in hfYFP      |
| 13981 | GGATCAGCTGGTTCAGCTGCTGGATCAGGTGAATTTATGATAAAAAATA<br>AAGTTATG TCAGAT        | Fw thermolinker <i>pcna1</i>          |
| 13982 | TGCATCTCGAGAGATAGTTTGGGTGCAAGTAAATA                                         | Rv <i>XhoI</i> <i>pcna1</i>           |
| 13983 | ATCGCCGCGGTACCTTATATCTCTTCGATAGTAC                                          | Fw <i>SacII</i> Native promoter PCNA2 |
| 13984 | GACTCCATGGGAGGTTTCCCCGATTATTATT                                             | Rv <i>NcoI</i> Native promoter PCNA1  |
| 14083 | TATGAAGTTGATCATAGAATAG                                                      | Fw point mutation H193Y in TGP        |
| 14084 | AGCATCTGGTAATCTAACATC                                                       | Rv point mutation H193Y in TGP        |
| 14702 | GATAAGCGTCTTACTTATCATAATGGTATCAAAGGGTGAAGAACTATTC                           | fw mfYFP for pSVA7000                 |
| 14703 | ATTCACCTGATCCAGCAGCTGAACCAGCTGATCCTTTATATAATTCATTCATATCA<br>TG              | Rev mfYFP for pSVA7000                |
| 14704 | GCTGCTGGATCAGGTGAATTTCCATGGCTAGTTGAAGAGC                                    | fw pSVA AraFXSt op from pSVA7000      |
| 14705 | TATGATAAGTAAGACGCTTATCAATTATTAGTATTTATTTAACATGTTAAACGTTA<br>TAAACGCTGAGTAAT | Rev pSVA AraFXSt op from pSVA7000     |
| 14706 | GGATCAGCTGGTTCAGCTGCTGGATCAGGTGAATTTATGGTATCAAAGGGTGAA<br>GAA               | fw mfYFP for pSVA7001                 |
| 14707 | TATAGTGAGACTTGAGAAAGTGGGCCCTTTATATAATTCATTCATATCATGAG<br>TTATTCCA           | Rev mfYFP for pSVA7001                |
| 14708 | TAAGGGCCCACTTTCTCAAGTCTCACTATAACCAATGAGTTTTCTTTAATCTTAT                     | fw pSVA AraFXSt op from pSVA7001      |

|       |                                                      |                                          |
|-------|------------------------------------------------------|------------------------------------------|
| 14709 | ACCTGATCCAGCAGCTGAACCAGCTGATCCCTCGAGTGCTGAAGAGCCGGAT | rev<br>pSVAraFXSt<br>op from<br>pSVA7001 |
|-------|------------------------------------------------------|------------------------------------------|
